# Supplementary material for: Succinylation of Polyallylamine: Influence on Biological Efficacy and the Formation of Electrospun Fibers
Source: Polymers (Basel). 2021 Aug 24;13(17):2840. doi: 10.3390/polym13172840 (PMC8433649; doi:10.3390/polym13172840)
Supplement: Supplementary file 1 [file polymers-13-02840-s001.zip › polymers-1332041-supplementary.pdf]

## Supplementary information (ESI)

# Succinylation of Polyallylamine: Influence on Biological Efficacy and the Formation of Electrospun Fibers

Lucija Jurko <sup>1</sup>, Matej Bračič <sup>1</sup>, Silvo Hribernik <sup>1,2</sup>, Damjan Makuc <sup>3,4</sup>, Janez Plavec <sup>3,4,5</sup>, Filip Jerenec <sup>6</sup>, Sonja Žabkar <sup>7</sup>, Nenad Gubeljak <sup>6</sup>, Alja Štern <sup>7</sup> and Rupert Kargl <sup>1,2,8\*</sup>

### XRD measurements

According to previous research on succinylation of polymers, in some cases, there was a difference in the crystallinity between the product and the base polymer <sup>1,2</sup>. With the increase of the DS of PAA, a difference in the macroscopic morphology of each product could be observed (Figure S1). This was especially seen when comparing the base polymer (PAA) to samples with a high DS (PAA-5SA and PAA-10SA).

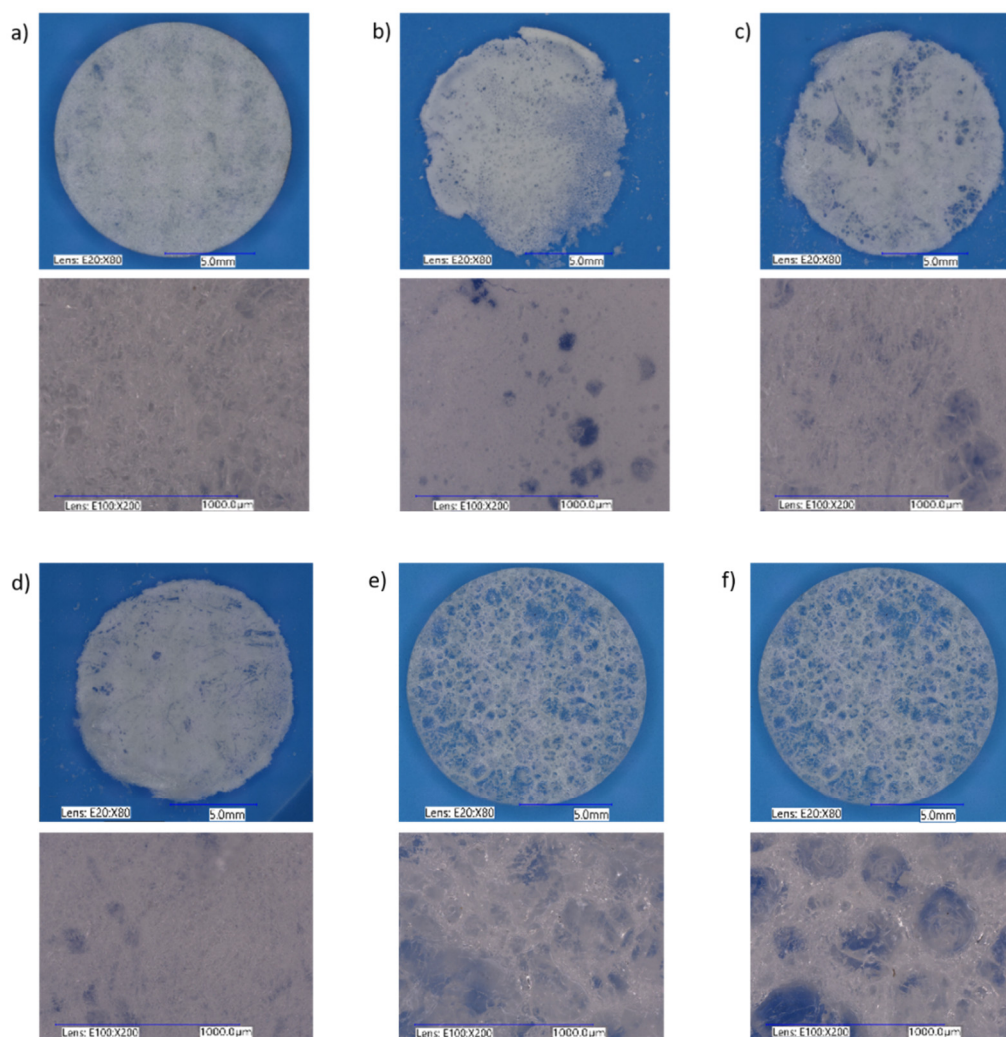

*Figure S1: Images of polymer powders: a) PAA, b) PAA-0.5SA, c) PAA-1SA, d) PAA-2.5SA, e) PAA-5SA, f) PAA-10SA, upper rows, photograph, lower rows light microscopy images.*

According to XRD measurements, crystallinity of the material did not change with increase DS and was calculated to be at approximately 22 % for each sample.

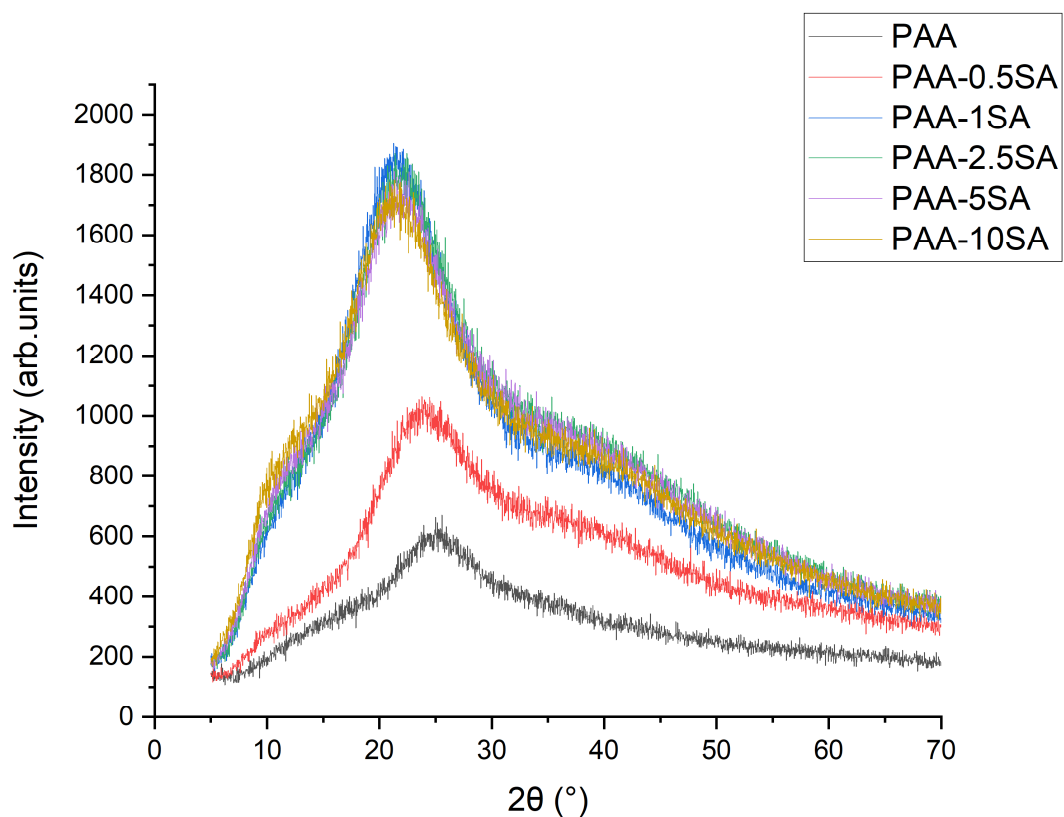

*Figure S2: XRD spectra of polymers: PAA, PAA-0.5SA, PAA -1SA, PAA-2.5SA, PAA-5SA, PAA-10SA*

Broad peaks of XRD spectra are in correspondence to the amorphous structure of polyallylamine hydrochloride with a 2  $\Theta$  peak between 23 and 28° in correspondence with literature <sup>2,3,4</sup>.



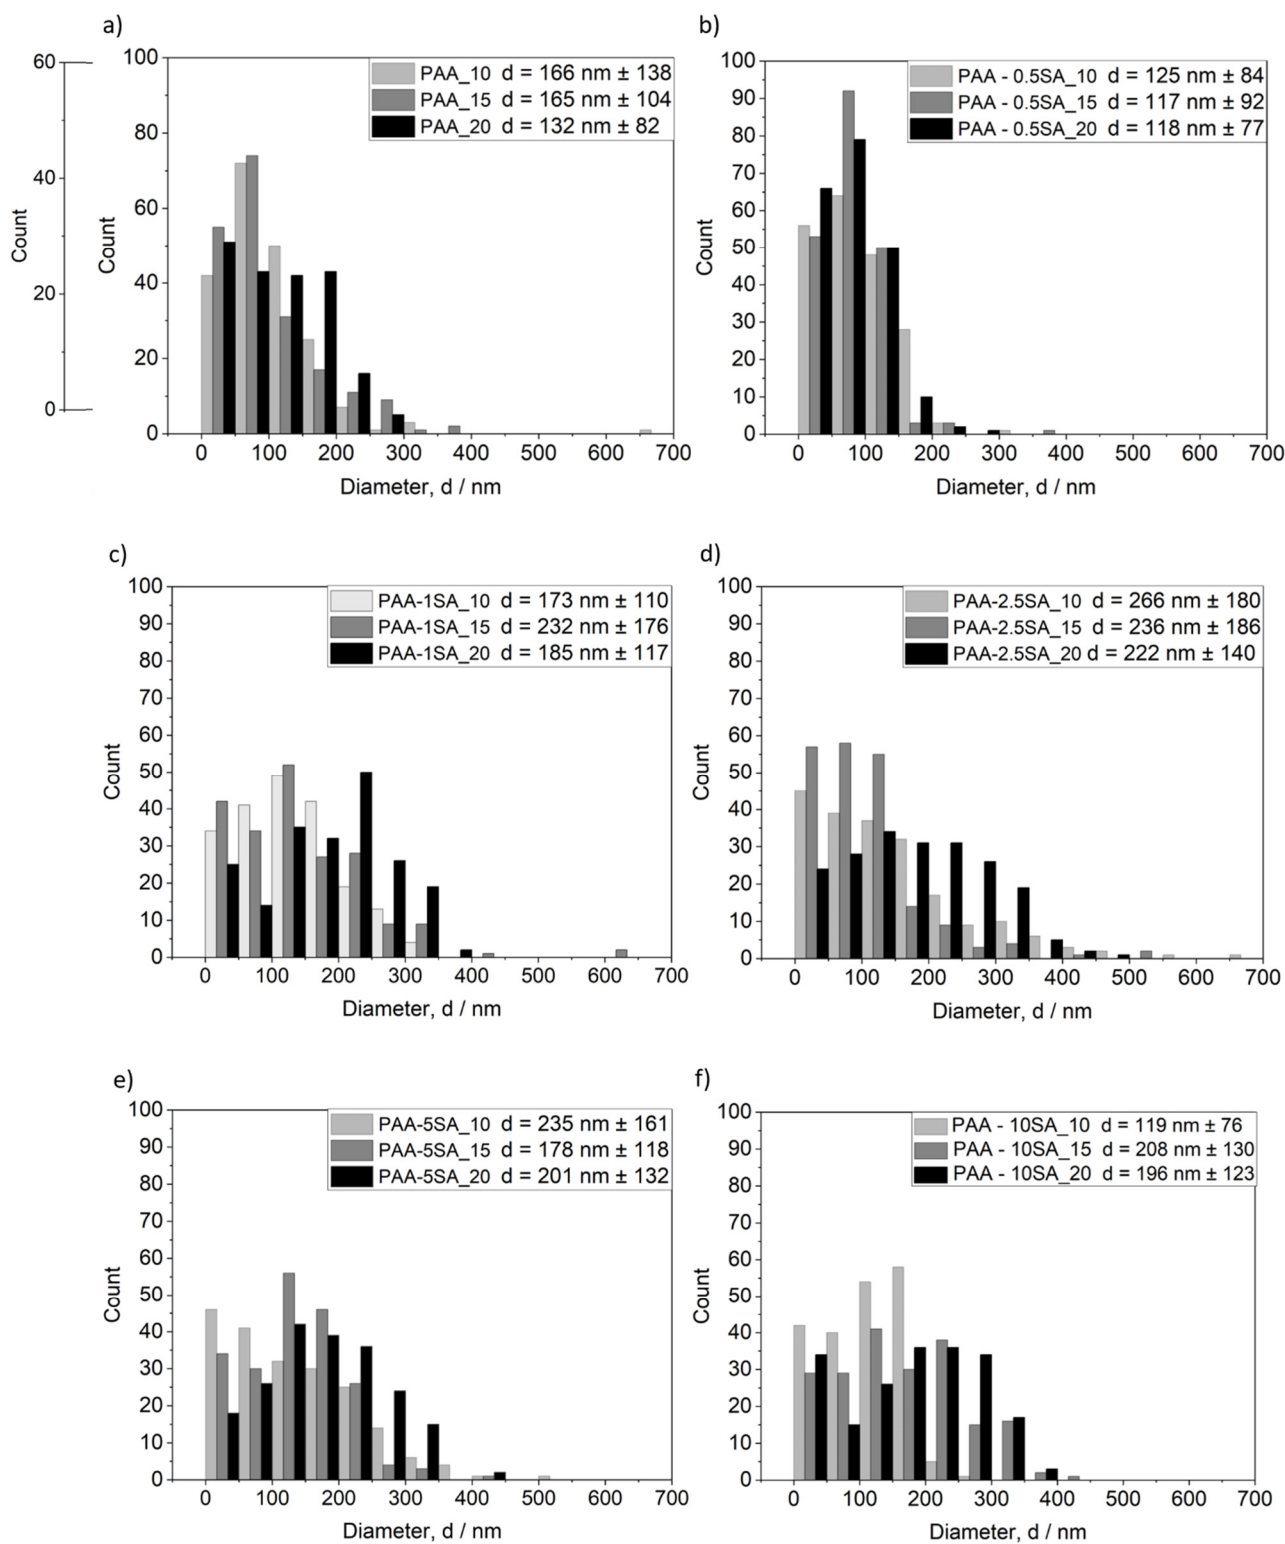

**Figure S3: Fiber diameter histograms:** PVA fibers (above) with addition of a) PAA, b) PAA-0.5SA, c) PAA-1SA, d) PAA-2.5 SA, e) PAA-5SA and f) PAA-10SA. 200 measurements were made from three repetitions per polymer type.

a)

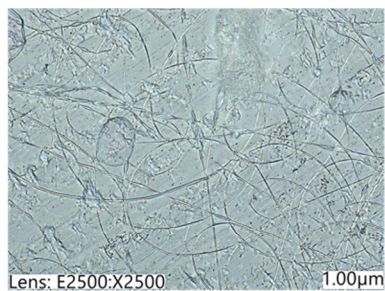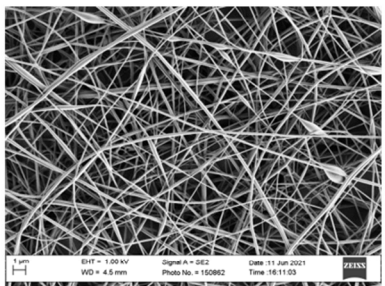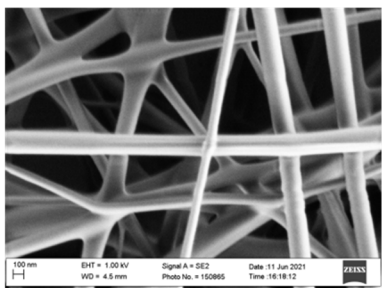

b)

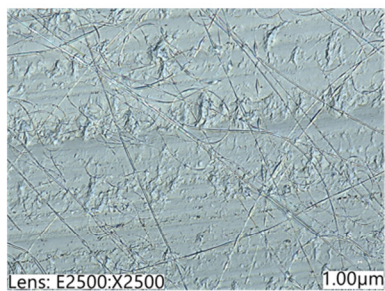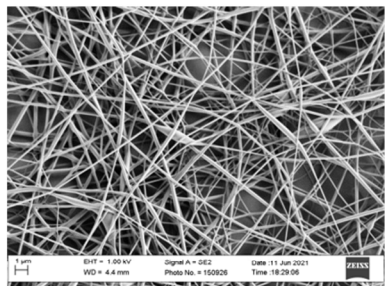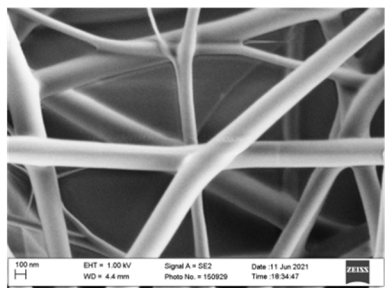

c)

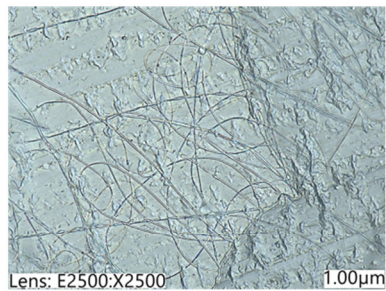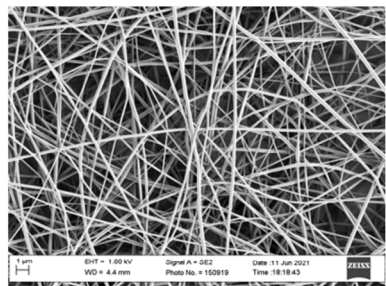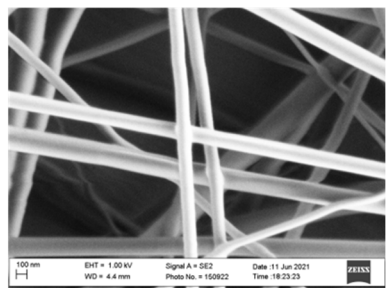

d)

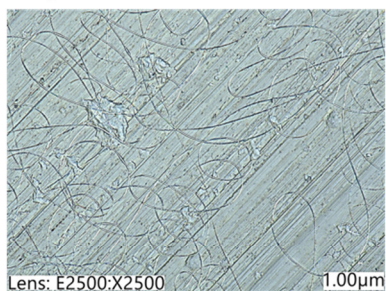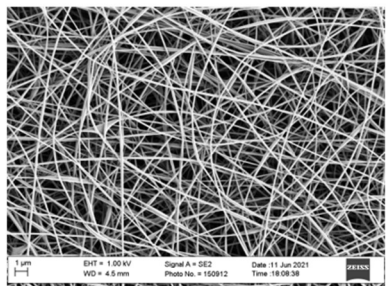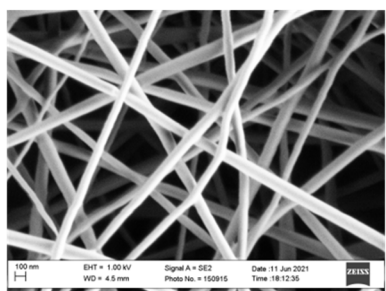

e)

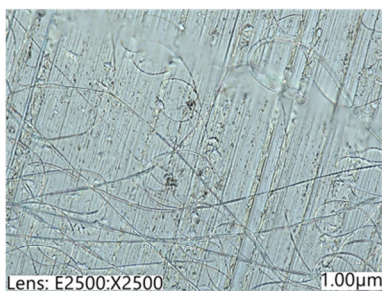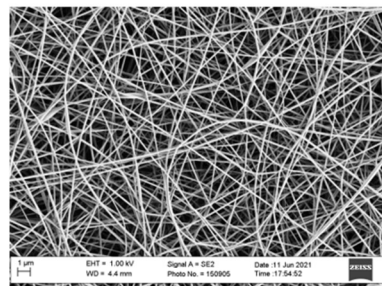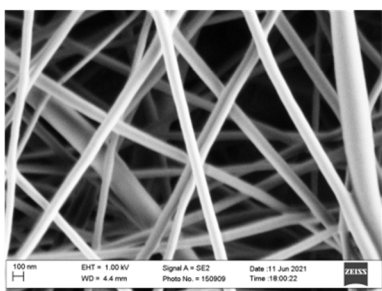

f)

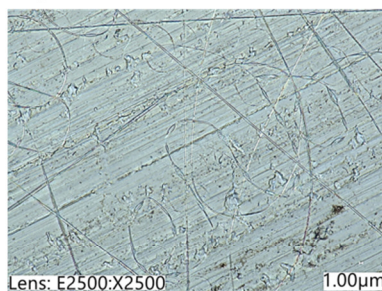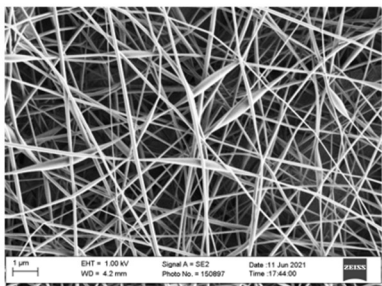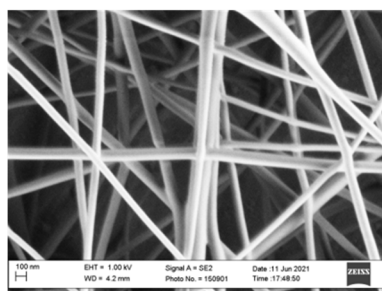

g)

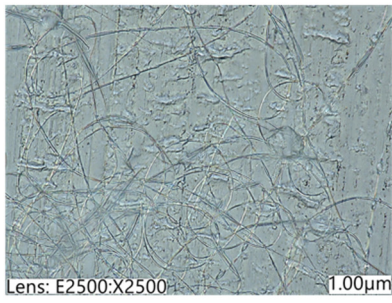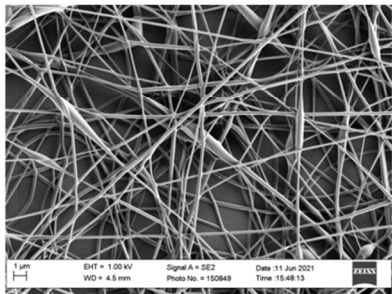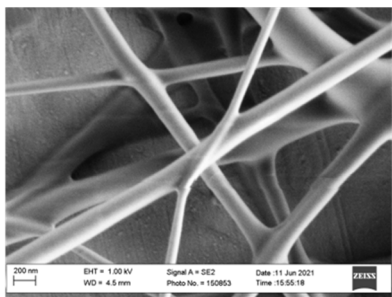

h)

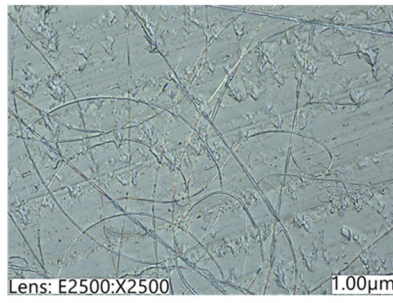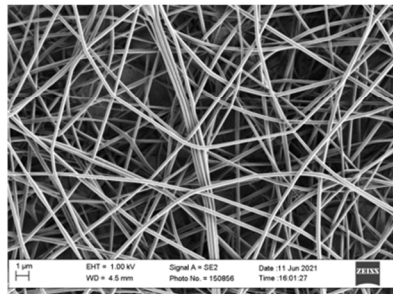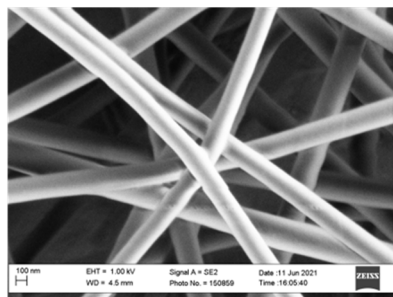

i)

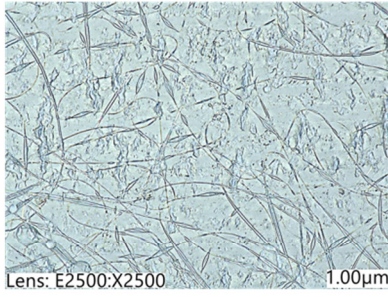

j)

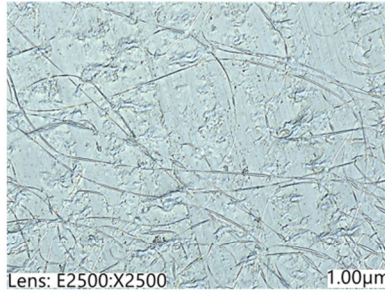

k)

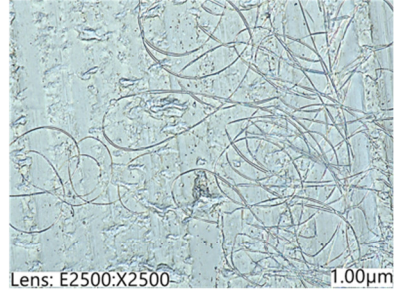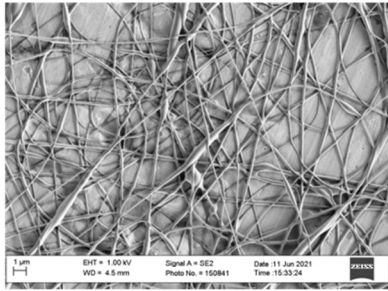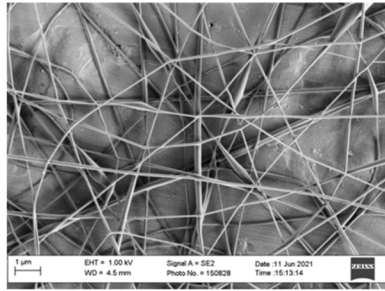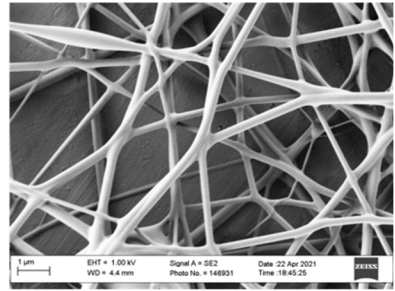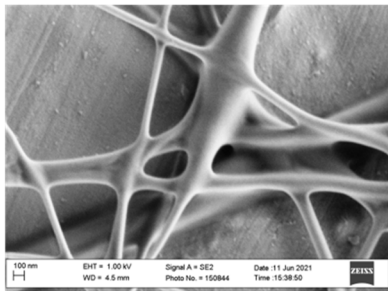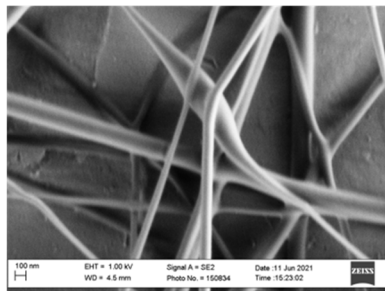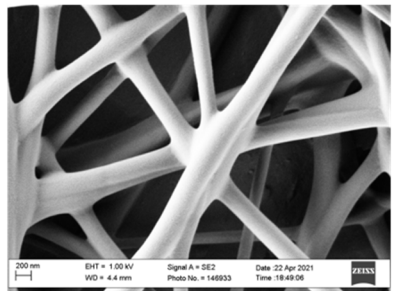

l)

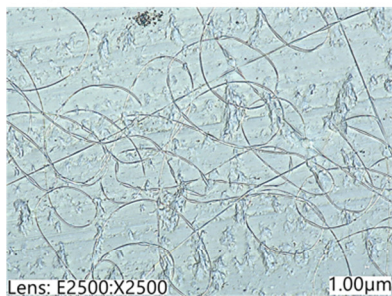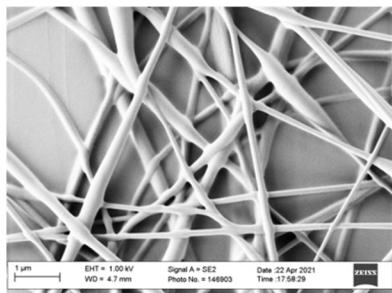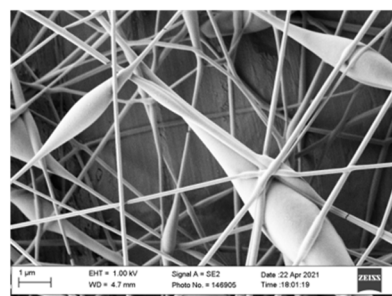

m)

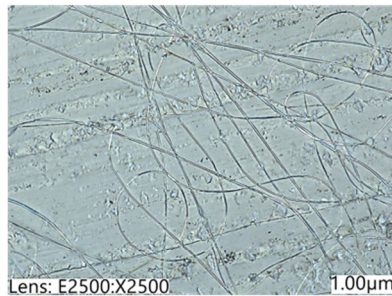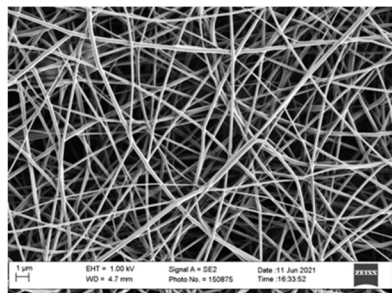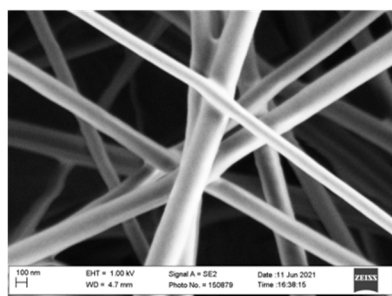

n)

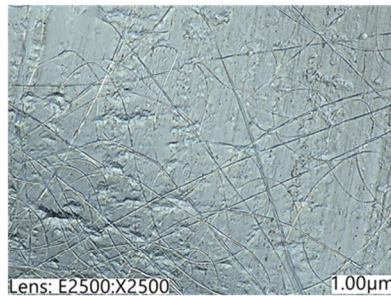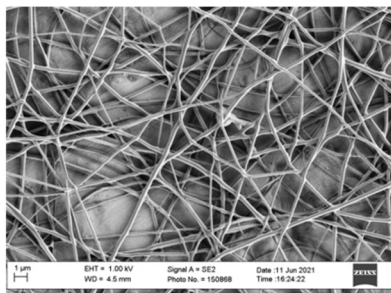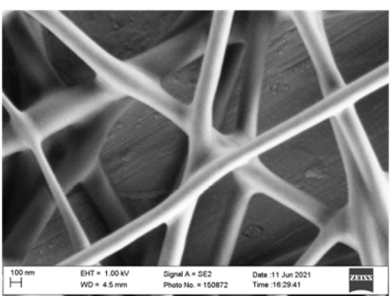

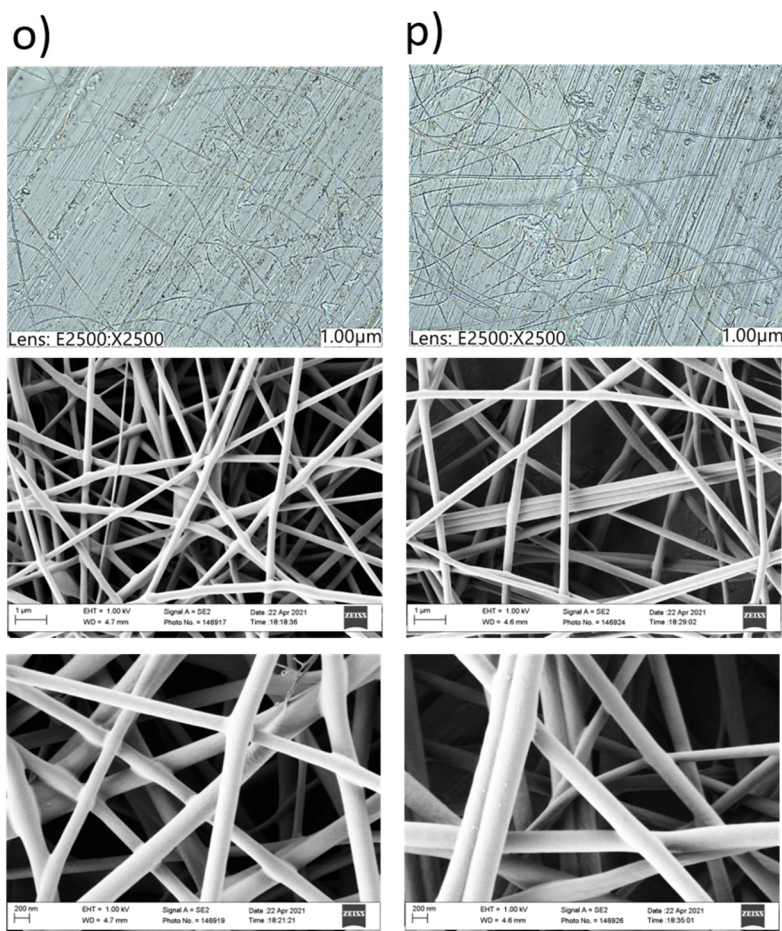

**Figure S4: Fiber morphology:** Optical microscope (upper row) and SEM images (lower rows) of a) PAA\_10, b) PAA\_15, c) PAA\_20, d) PAA-0.5SA\_10, e) PAA-0.5SA\_15, f) PAA-0.5SA\_20, g) PAA-1SA\_15, h) PAA-1SA\_20, i) PAA-2.5SA\_10, j) PAA-2.5SA\_15, k) PAA-2.5SA\_20, l) PAA-5SA\_10, m) PAA-5SA\_15, n) PAA-5SA\_20, o) PAA-10SA\_15, p) PAA-10SA\_20

## References

1. Liu, H. *et al.* Effect of annealing and pressure on microstructure of cornstarches with different amylose/amylopectin ratios. *Carbohydr. Res.* **344**, 350–354 (2009).
2. Wu, X., Liu, P., Ren, L., Tong, J. & Zhou, J. Optimization of corn starch succinylation using response surface methodology. *Starch/Staerke* **66**, 508–514 (2014).
3. Zhao, H., Wu, X., Tian, W. & Ren, S. Synthesis and thermal property of poly(allylamine hydrochloride). *Adv. Mater. Res.* **150–151**, 1480–1483 (2011).
4. Kyzas, G. Z., Sifafaka, P. I., Bikiaris, D. N., Koukaras, E. N. & Froudakis, G. E. Alternative use of cross-linked polyallylamine (known as Sevelamer pharmaceutical compound) as biosorbent. *J. Colloid Interface Sci.* **442**, 49–59 (2015).
